# Supplementary material for: Improvement of medication adherence in adolescents and young adults with SLE using web-based education with and without a social media intervention, a pilot study
Source: PubMed Central journal article supplement (PMC5852975; doi:10.1186/s12969-018-0232-2), 2018-03-14
Supplement: 12969_2018_232_MOESM1_ESM.pdf [file 12969_2018_232_MOESM1_ESM.pdf]

**Empowering Outcomes**

Answer categories:(1) completely disagree; (2) disagree; (3) neither agree nor disagree, (4) agree, (5) completely agree

|                        |          |                           |       |                     |
|------------------------|----------|---------------------------|-------|---------------------|
| Completely<br>Disagree | Disagree | Neither Agree<br>Disagree | Agree | Completely<br>Agree |
|------------------------|----------|---------------------------|-------|---------------------|

**Being Better Informed**

**Through my participation in the Facing Lupus Together Project**

|                                                                                            |                          |                          |                          |                          |                          |
|--------------------------------------------------------------------------------------------|--------------------------|--------------------------|--------------------------|--------------------------|--------------------------|
| I feel better informed as a patient.                                                       | <input type="checkbox"/> | <input type="checkbox"/> | <input type="checkbox"/> | <input type="checkbox"/> | <input type="checkbox"/> |
| I understand my illness better.                                                            | <input type="checkbox"/> | <input type="checkbox"/> | <input type="checkbox"/> | <input type="checkbox"/> | <input type="checkbox"/> |
| I have a clearer picture about my illness.                                                 | <input type="checkbox"/> | <input type="checkbox"/> | <input type="checkbox"/> | <input type="checkbox"/> | <input type="checkbox"/> |
| I feel like I have more (correct) knowledge at my disposal to deal better with my illness. | <input type="checkbox"/> | <input type="checkbox"/> | <input type="checkbox"/> | <input type="checkbox"/> | <input type="checkbox"/> |

**Feeling More Confident in the Relationship with Their Physician**

**Through my participation in the Facing Lupus Together Project**

|                                                                     |                          |                          |                          |                          |                          |
|---------------------------------------------------------------------|--------------------------|--------------------------|--------------------------|--------------------------|--------------------------|
| I feel better prepared for a doctor's appointment.                  | <input type="checkbox"/> | <input type="checkbox"/> | <input type="checkbox"/> | <input type="checkbox"/> | <input type="checkbox"/> |
| I am more knowledgeable about which questions to ask my physician   | <input type="checkbox"/> | <input type="checkbox"/> | <input type="checkbox"/> | <input type="checkbox"/> | <input type="checkbox"/> |
| I can explain my needs to my physician better.                      | <input type="checkbox"/> | <input type="checkbox"/> | <input type="checkbox"/> | <input type="checkbox"/> | <input type="checkbox"/> |
| I have more courage to raise matters with my physician.             | <input type="checkbox"/> | <input type="checkbox"/> | <input type="checkbox"/> | <input type="checkbox"/> | <input type="checkbox"/> |
| I am more able to oppose my physician better.                       | <input type="checkbox"/> | <input type="checkbox"/> | <input type="checkbox"/> | <input type="checkbox"/> | <input type="checkbox"/> |
| the relationship with my physician has improved.                    | <input type="checkbox"/> | <input type="checkbox"/> | <input type="checkbox"/> | <input type="checkbox"/> | <input type="checkbox"/> |
| the relationship with my physician has deteriorated.                | <input type="checkbox"/> | <input type="checkbox"/> | <input type="checkbox"/> | <input type="checkbox"/> | <input type="checkbox"/> |
| I am more able to judge when I really need the help of my physician | <input type="checkbox"/> | <input type="checkbox"/> | <input type="checkbox"/> | <input type="checkbox"/> | <input type="checkbox"/> |
| I feel less dependent on my physician.                              | <input type="checkbox"/> | <input type="checkbox"/> | <input type="checkbox"/> | <input type="checkbox"/> | <input type="checkbox"/> |
| I am more able to think along with my physician about my treatment. | <input type="checkbox"/> | <input type="checkbox"/> | <input type="checkbox"/> | <input type="checkbox"/> | <input type="checkbox"/> |

**Improved Acceptance of the Illness**

**Through my participation in the Facing Lupus Together Project**

|                                                                        |                          |                          |                          |                          |                          |
|------------------------------------------------------------------------|--------------------------|--------------------------|--------------------------|--------------------------|--------------------------|
| I am able to be more open about my own illness.                        | <input type="checkbox"/> | <input type="checkbox"/> | <input type="checkbox"/> | <input type="checkbox"/> | <input type="checkbox"/> |
| I can tell others more easily when I am no longer able to do something | <input type="checkbox"/> | <input type="checkbox"/> | <input type="checkbox"/> | <input type="checkbox"/> | <input type="checkbox"/> |

APPENDIX B

|                                                                                       |                          |                          |                          |                          |                          |
|---------------------------------------------------------------------------------------|--------------------------|--------------------------|--------------------------|--------------------------|--------------------------|
| I can ask others for help more quickly.                                               | <input type="checkbox"/> | <input type="checkbox"/> | <input type="checkbox"/> | <input type="checkbox"/> | <input type="checkbox"/> |
| I can give in to my illness better.                                                   | <input type="checkbox"/> | <input type="checkbox"/> | <input type="checkbox"/> | <input type="checkbox"/> | <input type="checkbox"/> |
| I can accept my illness better.                                                       | <input type="checkbox"/> | <input type="checkbox"/> | <input type="checkbox"/> | <input type="checkbox"/> | <input type="checkbox"/> |
| <b>Feeling More Confident about the Treatment</b>                                     |                          |                          |                          |                          |                          |
| <b>Through my participation in the Facing Lupus Together Project</b>                  |                          |                          |                          |                          |                          |
| I can stick to my treatment regime better.                                            | <input type="checkbox"/> | <input type="checkbox"/> | <input type="checkbox"/> | <input type="checkbox"/> | <input type="checkbox"/> |
| I am more able to follow the medical guidelines and advice of my physician            | <input type="checkbox"/> | <input type="checkbox"/> | <input type="checkbox"/> | <input type="checkbox"/> | <input type="checkbox"/> |
| I know where to go with questions about my illness.                                   | <input type="checkbox"/> | <input type="checkbox"/> | <input type="checkbox"/> | <input type="checkbox"/> | <input type="checkbox"/> |
| I feel I am more skilled at dealing well with my illness.                             | <input type="checkbox"/> | <input type="checkbox"/> | <input type="checkbox"/> | <input type="checkbox"/> | <input type="checkbox"/> |
| I feel able to make the right decisions with regard to my illness.                    | <input type="checkbox"/> | <input type="checkbox"/> | <input type="checkbox"/> | <input type="checkbox"/> | <input type="checkbox"/> |
| <b>Increased Optimism and Control over the Future</b>                                 |                          |                          |                          |                          |                          |
| <b>Through my participation in the Facing Lupus Together Project</b>                  |                          |                          |                          |                          |                          |
| I feel more in charge of the course of my illness.                                    | <input type="checkbox"/> | <input type="checkbox"/> | <input type="checkbox"/> | <input type="checkbox"/> | <input type="checkbox"/> |
| I feel I can influence my illness myself.                                             | <input type="checkbox"/> | <input type="checkbox"/> | <input type="checkbox"/> | <input type="checkbox"/> | <input type="checkbox"/> |
| I feel more in control over what is happening to me.                                  | <input type="checkbox"/> | <input type="checkbox"/> | <input type="checkbox"/> | <input type="checkbox"/> | <input type="checkbox"/> |
| I feel less in control over what is happening to me.                                  | <input type="checkbox"/> | <input type="checkbox"/> | <input type="checkbox"/> | <input type="checkbox"/> | <input type="checkbox"/> |
| I feel that what happens to me in the future is to a large degree dependent on myself | <input type="checkbox"/> | <input type="checkbox"/> | <input type="checkbox"/> | <input type="checkbox"/> | <input type="checkbox"/> |
| I have learned to be more positive.                                                   | <input type="checkbox"/> | <input type="checkbox"/> | <input type="checkbox"/> | <input type="checkbox"/> | <input type="checkbox"/> |
| I have more faith in the future.                                                      | <input type="checkbox"/> | <input type="checkbox"/> | <input type="checkbox"/> | <input type="checkbox"/> | <input type="checkbox"/> |
| I have less faith in the future.                                                      | <input type="checkbox"/> | <input type="checkbox"/> | <input type="checkbox"/> | <input type="checkbox"/> | <input type="checkbox"/> |
| <b>Enhanced Self-Esteem</b>                                                           |                          |                          |                          |                          |                          |
| <b>Through my participation in the Facing Lupus Together Project</b>                  |                          |                          |                          |                          |                          |
| I have a greater sense of worth.                                                      | <input type="checkbox"/> | <input type="checkbox"/> | <input type="checkbox"/> | <input type="checkbox"/> | <input type="checkbox"/> |
| I have a more positive attitude towards myself.                                       | <input type="checkbox"/> | <input type="checkbox"/> | <input type="checkbox"/> | <input type="checkbox"/> | <input type="checkbox"/> |
| I am in general more content with myself.                                             | <input type="checkbox"/> | <input type="checkbox"/> | <input type="checkbox"/> | <input type="checkbox"/> | <input type="checkbox"/> |
| <b>Enhanced Social Well-Being</b>                                                     |                          |                          |                          |                          |                          |
| <b>Through my participation in the Facing Lupus Together Project</b>                  |                          |                          |                          |                          |                          |
| I feel less lonely.                                                                   | <input type="checkbox"/> | <input type="checkbox"/> | <input type="checkbox"/> | <input type="checkbox"/> | <input type="checkbox"/> |
| I have made new social contacts.                                                      | <input type="checkbox"/> | <input type="checkbox"/> | <input type="checkbox"/> | <input type="checkbox"/> | <input type="checkbox"/> |
